# Supplementary material
Source: MDPI journal article supplement (https://www.mdpi.com/2226-471X/7/3/240)
Supplement: s1 [file s1]

Archive with 2 entries (2 files):
- Supplementary Materials 1 - Stimulus Pictures.pdf
- Supplementary Materials 2 - Tables 1-9.pdf
