# Supplementary material
Source: MDPI journal article supplement (https://www.mdpi.com/2226-471X/7/3/240)
Supplement: s1 [file s1 › Supplementary Materials 2 - Tables 1-9.pdf]

Tables corresponding to Figures 1-9

**Table S1.** Absolute frequency of additive particles (*also, too, as well, either, neither, and auch*) in relation to the number of words in the two sub-corpora.

|         | Speaker dyads | Corpus size | Additive particles                |                                        |       |       |
|---------|---------------|-------------|-----------------------------------|----------------------------------------|-------|-------|
|         |               |             | confirmations<br>(additive/total) | polarity questions<br>(additive/total) | other | total |
| English | 14            | 7086 words  | 14/76                             | 2/60                                   | 12    | 28    |
| German  | 10            | 5682 words  | 45/56                             | 17/22                                  | 26    | 88    |

**Table S2.** Types of confirming second moves, absolute numbers.

|         | Speaker dyads | comparison | description | total |
|---------|---------------|------------|-------------|-------|
| English | 14            | 42         | 34          | 76    |
| German  | 10            | 7          | 49          | 56    |
| total   |               | 49         | 83          |       |

**Table S3.** Forms of comparisons, absolute numbers.

|         | Speaker dyads | “same” | sentence | total |
|---------|---------------|--------|----------|-------|
| English | 14            | 26     | 16       | 42    |
| German  | 10            | 1      | 6        | 7     |

**Table S4.** Additive particles in confirming descriptions, absolute numbers.

|         | Speaker dyads | additive particle | no particle | total |
|---------|---------------|-------------------|-------------|-------|
| English | 14            | 14                | 20          | 34    |
| German  | 10            | 45                | 4           | 49    |

**Table S5.** Realisation of changing information unit (reference to speaker's picture) in confirming descriptions, absolute numbers.

|         | 1 <sup>st</sup> person pronoun | adverbial | possessive pronoun | implicit | total |
|---------|--------------------------------|-----------|--------------------|----------|-------|
| English | 17                             | 1         | 8                  | 8        | 34    |
| German  | 16                             | 25        | 4                  | 4        | 49    |

**Table S6.** Realisation of changing information unit (reference to speaker's picture) in confirming descriptions with and without additive particles, absolute numbers.

| Language | additive particles | 1 <sup>st</sup> person pronoun | adverbial | possessive pronoun | implicit | total |
|----------|--------------------|--------------------------------|-----------|--------------------|----------|-------|
| English  | with particle      | 7                              | 0         | 7                  |          | 14    |
|          | without particle   | 10                             | 1         | 1                  | 8        | 20    |
| German   | with particle      | 16                             | 25        | 4                  |          | 45    |
|          | without particle   | 0                              | 0         | 0                  | 4        | 4     |

**Table S7.** Descriptions with first person subject pronouns: Frequency of word order patterns and additive particles, absolute numbers.

| Language | Word order |    | Additive particles |                     | total |
|----------|------------|----|--------------------|---------------------|-------|
|          | SV         | VS | additiv particle   | no additiv particle |       |
| English  | 17         | 0  | 7                  | 10                  | 17    |
| German   | 1          | 15 | 16                 | 0                   | 16    |

**Table S8.** Frequency of the five construction types identified in confirming descriptions, absolute numbers.

| Construction               | English |      | German |      |
|----------------------------|---------|------|--------|------|
|                            | +add    | -add | +add   | -add |
| E is [adv] x               | 0       | 1    | 25     | 0    |
| E is x                     | 0       | 8    | 0      | 4    |
| E have [1 <sup>st</sup> p] | 0       | 0    | 15*    | 0    |
| [poss] is x                | 7       | 1    | 4      | 0    |
| [1 <sup>st</sup> p] have E | 7       | 10   | 1      | 0    |
| total                      | 14      | 20   | 45     | 4    |

\*10 postverbal, 5 verbless

**Table S9.** Frequency of additive particles in polarity questions, absolute numbers.

| Language | additive | no particle | total |
|----------|----------|-------------|-------|
| English  | 2        | 58          | 60    |
| German   | 11       | 11          | 22    |
