# Supplementary material
Source: MDPI journal article supplement (https://www.mdpi.com/2226-471X/7/3/240)

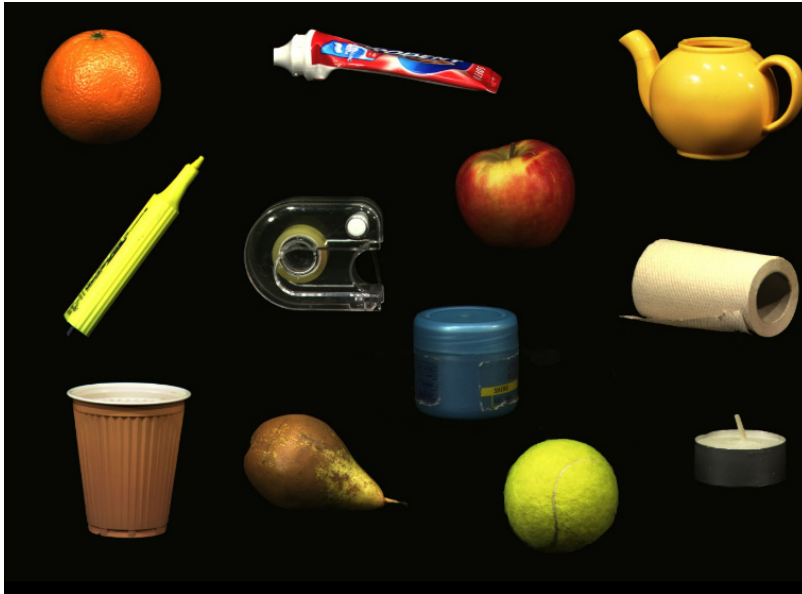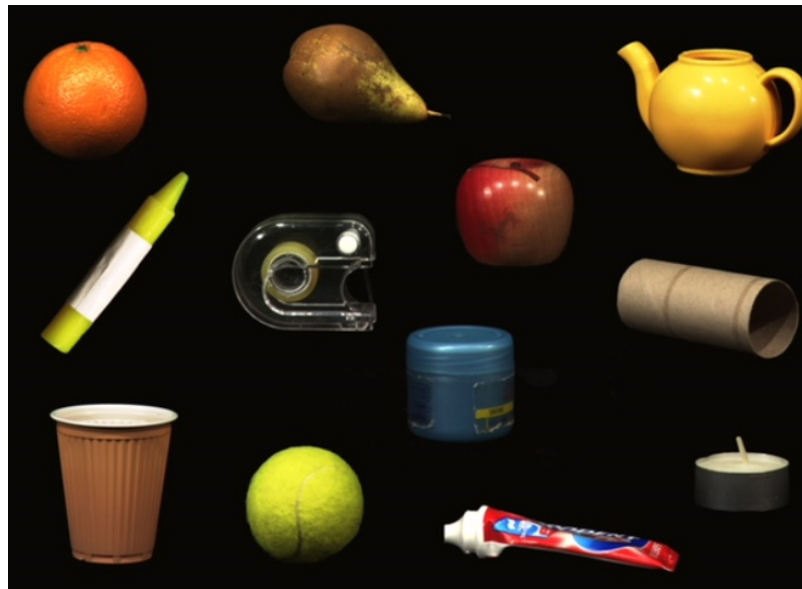

**Figure S1.** Stimulus pictures used in the picture comparison task.

Supplement: s1 [file s1]
